# Supplementary material for: Transcriptomic analysis of cork during seasonal growth highlights regulatory and developmental processes from phellogen to phellem formation
Source: PubMed Central journal article supplement (PMC8187341; doi:10.1038/s41598-021-90938-5), 2021-06-08
Supplement: 41598_2021_90938_MOESM1_ESM.pdf [file 41598_2021_90938_MOESM1_ESM.pdf]

**Supplemental figure file for:**

**Transcriptomic analysis of cork during seasonal growth highlights regulatory and developmental processes from phellogen to phellem formation**

Sandra Fernández-Piñán<sup>1</sup>, Pau Boher<sup>1</sup>, Marçal Soler<sup>1</sup>, Mercè Figueras<sup>1</sup> and Olga Serra<sup>1\*</sup>

<sup>1</sup>Laboratori del Suro, Departament de Biologia, Universitat de Girona, Campus Montilivi, E-17003 Girona, Spain.

\*corresponding author: Olga Serra, olga.serra@udg.edu

**Supplemental Tables 3-8 and Supplemental datasets 1 and 2 are presented in separated Excel files.**

## Supplemental Figure 1

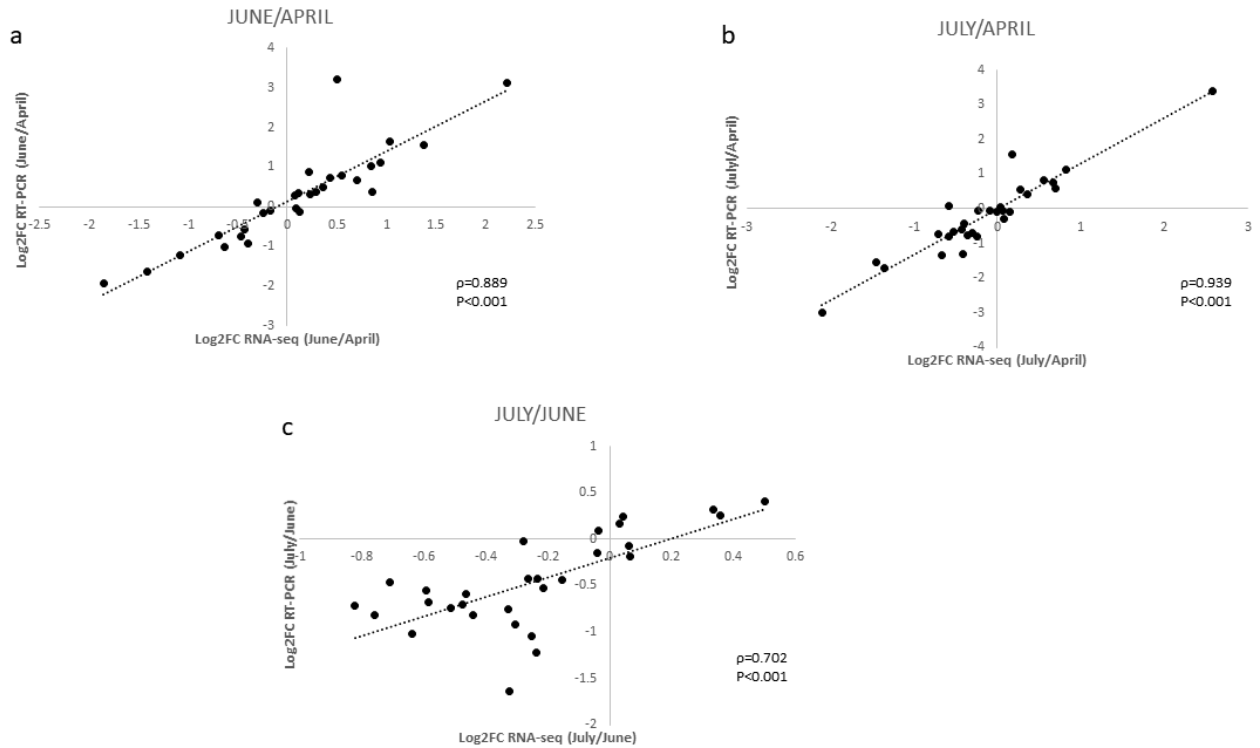

**Supplemental Figure 1.** Correlation between log<sub>2</sub>Fold-Change data obtained in the RT-qPCR and RNA-seq experiments. The linear regression with the Pearson correlation ( $\rho$ ) is represented. Correlation results obtained for comparison between the data obtained in June/April (a), July/April (b) and July/June (c). The data and genes under study are presented in Supplemental Table 2.

## Supplemental Figure 2

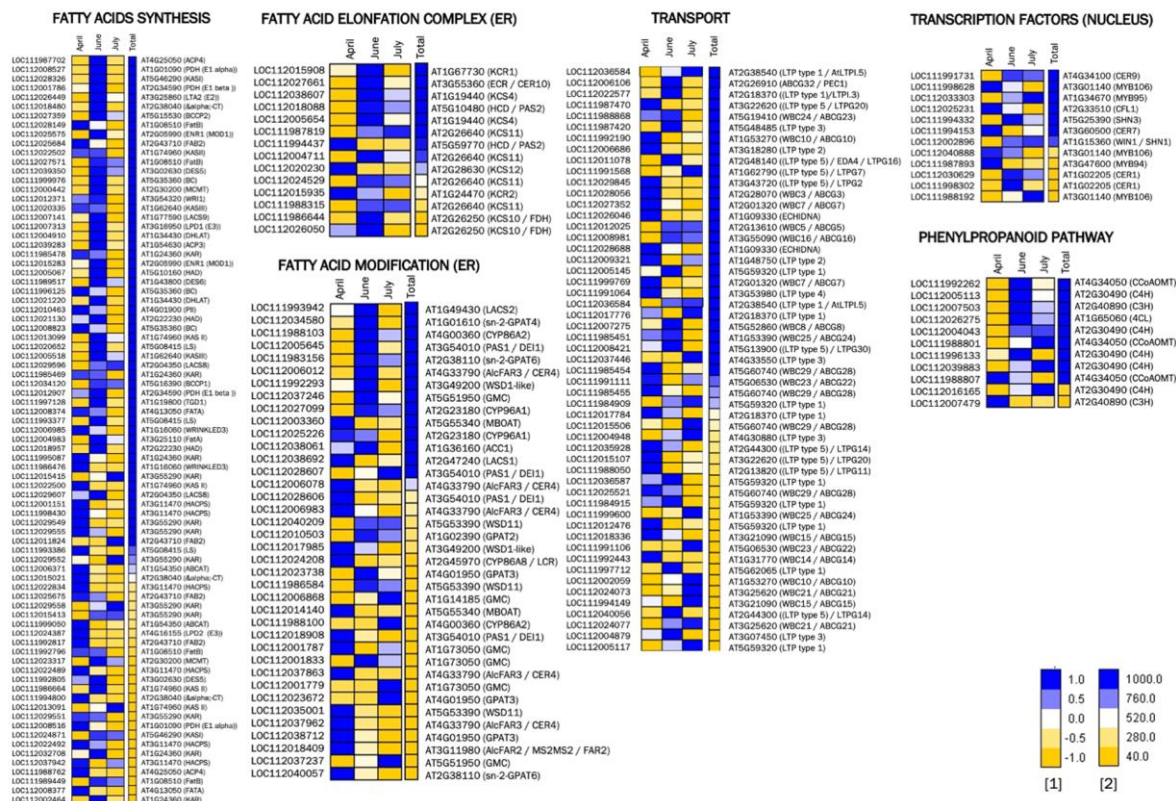

**Supplemental Figure 2.** Expression pattern along the cork growing season of AraLip genes not related previously with suberization process. For each gene, the relative expression pattern (April, June and July) [1] and the total expression [2] of normalized read counts are shown as a heatmap, in which blue and yellow colours represent high and low expression values. ER = endoplasmic reticulum. The heatmaps were constructed using the EXPANDERS software<sup>75</sup>.

### Supplemental Figure 3

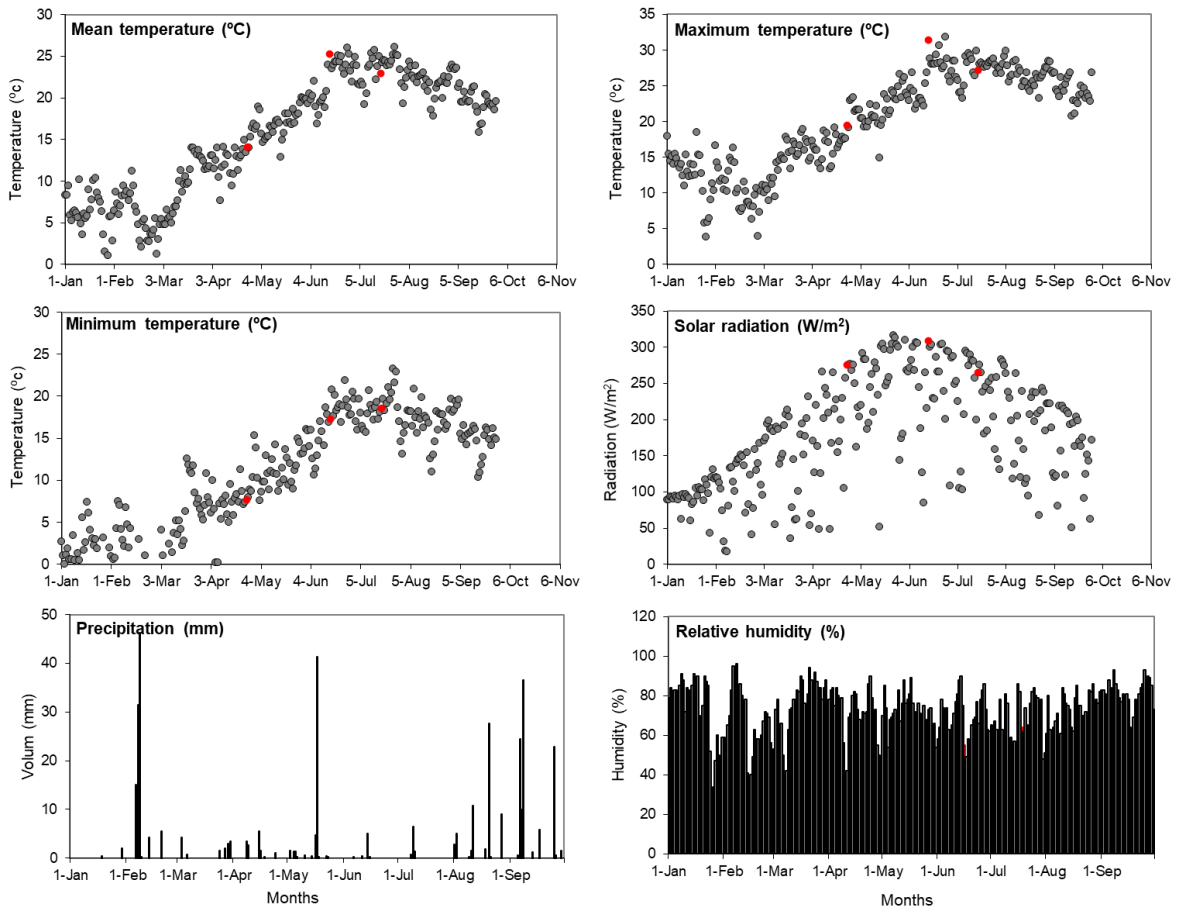

**Supplemental Figure 3.** Climatic conditions in the region where the samples were collected, from January to September 2005. The mean, maximum and minimum temperature (°C), solar radiation ( $\text{W m}^{-2}$ ), precipitation (mm), and relative humidity (%) are depicted. The data points corresponding to the days when the samples under analyses were collected are highlighted in red.

**Supplemental Table 1.** Metrics of RNA-seq data.

| Sample name  | FastQC trimmed sequences |                                           |                               |                          | Mapping against GCF_002906115.1 (CorkOak1.0)        |                                   |                            | Functional annotation Arabidopsis          |
|--------------|--------------------------|-------------------------------------------|-------------------------------|--------------------------|-----------------------------------------------------|-----------------------------------|----------------------------|--------------------------------------------|
|              | Average GC content (%)   | Total reads (millions - 10 <sup>6</sup> ) | Average trimmed sequences (%) | Average read length (bp) | Uniquely mapped reads (millions - 10 <sup>6</sup> ) | Average uniquely mapped reads (%) | Total Q. suber loci mapped | BLASTX hit TAIR10 (Arabidopsis protein Db) |
| <b>Total</b> | <b>45.1</b>              | <b>568.3</b>                              | <b>11.9</b>                   | <b>122.0</b>             | <b>464.7</b>                                        | <b>81.3</b>                       | <b>32024</b>               | <b>30676</b>                               |
| April_1      | 44                       | 58.7                                      | 9.5                           | 122.0                    | 50.5                                                | 86.1                              |                            |                                            |
| April_2      | 45                       | 51.8                                      | 11.6                          | 122.0                    | 43.3                                                | 83.7                              |                            |                                            |
| April_3      | 44                       | 57.7                                      | 11.9                          | 122.0                    | 48.5                                                | 84.1                              |                            |                                            |
| April_4      | 44                       | 68.3                                      | 16.4                          | 122.0                    | 56.9                                                | 83.4                              |                            |                                            |
| June_1       | 46                       | 40.4                                      | 12.9                          | 122.0                    | 31.4                                                | 77.7                              |                            |                                            |
| June_3       | 45                       | 73.4                                      | 11.2                          | 122.0                    | 60.9                                                | 83.0                              |                            |                                            |
| June_4       | 45                       | 52.1                                      | 9.7                           | 122.0                    | 42.9                                                | 82.4                              |                            |                                            |
| July_1       | 47                       | 40.2                                      | 15.5                          | 122.0                    | 27.4                                                | 68.3                              |                            |                                            |
| July_2       | 46                       | 48.5                                      | 10.8                          | 122.0                    | 39.0                                                | 80.4                              |                            |                                            |
| July_3       | 45                       | 36.9                                      | 11.4                          | 122.0                    | 30.8                                                | 83.4                              |                            |                                            |
| July_4       | 45                       | 40.3                                      | 9.5                           | 122.0                    | 33.1                                                | 82.1                              |                            |                                            |

**Supplemental Table 2.** Gene expression values (log<sub>2</sub>Fold-Change) of RNA-seq and qRT-PCR (RTA) data used to validate the RNA-seq analysis.

| Category                | ID <i>Quercus</i> | ID <i>Arabidopsis</i> | Gene Name                    | DESCRIPTIONS                                               | JUNE/APRIL  |                      | JULY/APRIL  |                      | JULY/JUNE   |                      |
|-------------------------|-------------------|-----------------------|------------------------------|------------------------------------------------------------|-------------|----------------------|-------------|----------------------|-------------|----------------------|
|                         |                   |                       |                              |                                                            | Log2RNA-seq | Log2RTA <sup>1</sup> | Log2RNA-seq | Log2RTA <sup>1</sup> | Log2RNA-seq | Log2RTA <sup>1</sup> |
| Carbohydrate metabolism | LOC112019923      | AT3G43190             | SUS4                         | <i>Sucrose Synthase 4</i>                                  | 0.290       | 0.373                | 0.059       | -0.053               | -0.232      | -0.426               |
| Fatty acids synthesis   | LOC112030007      | AT1G01090             | PDH-E1 $\alpha$ <sup>2</sup> | <i>Pyruvate Dehydrogenase e1 alpha</i>                     | 0.432       | 0.722                | -0.010      | -0.093               | -0.442      | -0.815               |
|                         | LOC112012371      | AT3G54320             | WRI1 <sup>2</sup>            | <i>WRINKLED 1</i>                                          | 0.114       | 0.35                 | -0.526      | -0.664               | -0.639      | -1.014               |
|                         | LOC112028149      | AT1G08510             | FATB                         | <i>Fatty Acyl-ACP Thioesterases B</i>                      | -0.695      | -0.73                | -1.454      | -1.545               | -0.759      | -0.814               |
| Cell wall               | LOC112019461      | AT2G40610             | EXPA8                        | <i>Expansin A8</i>                                         | 0.842       | 1.033                | 0.690       | 0.589                | -0.153      | -0.444               |
| Hormone metabolism      | LOC111999928      | AT3G13380             | BRL3 <sup>2</sup>            | <i>BRI1-like 3</i>                                         | 0.237       | 0.31                 | 0.281       | 0.556                | 0.045       | 0.246                |
|                         | LOC112022266      | AT1G70940             | PIN3                         | <i>PIN-formed 3</i>                                        | -0.637      | -1.022               | -0.304      | -0.699               | 0.333       | 0.323                |
|                         | LOC112001486      | AT3G63010             | GID1B <sup>2</sup>           | <i>GA Insentitive DWARF 1B</i>                             | 0.499       | 3.206                | 0.174       | 1.566                | -0.325      | -1.64                |
| Cell death              | LOC111985828      | AT5G47120             | BII                          | <i>BAX inhibitor 1</i>                                     | 0.856       | 0.366                | 0.147       | -0.092               | -0.709      | -0.458               |
| Meristem regulation     | LOC111993884      | AT3G23150             | ETR2 <sup>2</sup>            | <i>Ethylene response 2</i>                                 | 0.218       | 0.874                | -0.087      | -0.038               | -0.306      | -0.912               |
|                         | LOC111994940      | AT3G19820             | DWF1                         | <i>DWARF 1</i>                                             | -0.429      | -0.564               | -0.363      | -0.753               | 0.066       | -0.19                |
|                         | LOC112030007      | AT1G27320             | HK3 <sup>2</sup>             | <i>Histidine Kinase 3</i>                                  | -0.306      | 0.117                | -0.584      | 0.097                | -0.278      | -0.02                |
|                         | LOC111993990      | AT1G36062             | STM                          | <i>Shoot Meristemless</i>                                  | -1.413      | -1.65                | -1.351      | -1.722               | 0.062       | -0.072               |
|                         | LOC111988759      | AT1G46480             | WOX4                         | <i>Wuschel Related Homeobox 4</i>                          | -1.078      | -1.212               | -0.576      | -0.806               | 0.501       | 0.406                |
|                         | LOC112029705      | AT4G32880             | HB8 <sup>2</sup>             | <i>Homeobox Gene 8</i>                                     | 1.032       | 1.64                 | 0.817       | 1.117                | -0.216      | -0.523               |
| Transcription factors   | LOC111990209      | AT2G46130             | WRKY43                       | <i>WRKY DNA-Binding protein 43</i>                         | 0.084       | -0.031               | -0.244      | -0.783               | -0.328      | -0.753               |
|                         | LOC112037487      | AT3G18400             | NAC058                       | <i>NAC Domain containing protein 58</i>                    | 0.079       | 0.284                | -0.398      | -0.415               | -0.477      | -0.699               |
| MADS-box proteins       | LOC112015273      | AT5G10140             | FLC                          | <i>Flowering Locus C</i>                                   | -0.400      | -0.924               | -0.665      | -1.349               | -0.265      | -0.426               |
|                         | LOC112012679      | AT2G45660             | SOC1                         | <i>Supressor of Overexpression of CO 1</i>                 | -0.247      | -0.15                | -0.709      | -0.745               | -0.462      | -0.594               |
|                         | LOC111991050      | AT1G69120             | AP1                          | <i>Apetala 1</i>                                           | -0.176      | -0.093               | -0.411      | -1.314               | -0.235      | -1.221               |
| Suberin synthesis       | LOC112007140      | AT5G41040             | ASFT/HCBT                    | <i>N-Hydroxycinnamoyl/Benzoyl Transferase</i>              | 0.550       | 0.775                | 0.036       | 0.039                | -0.514      | -0.735               |
|                         | LOC112038977      | AT5G58860             | CYP86A1                      | <i>Cytochrome P450 Family 86 Subfamily A Polypeptide 1</i> | 0.936       | 1.108                | 0.352       | 0.436                | -0.584      | -0.672               |
|                         | LOC112028279      | AT3G11430             | GPAT5                        | <i>Glycerol-3-Phosphatase sn-2-acyl Transferase 5</i>      | 0.357       | 0.5                  | -0.235      | -0.046               | -0.591      | -0.546               |
| Secondary metabolism    | LOC111989132      | AT1G61720             | BAN                          | <i>Barely Any Meristem</i>                                 | -0.466      | -0.762               | -0.434      | -0.591               | 0.032       | 0.171                |
|                         | LOC112000640      | AT1G78955             | bAS                          | <i><math>\beta</math>-Amyrin Synthase</i>                  | 1.381       | 1.55                 | 0.557       | 0.839                | -0.824      | -0.711               |
|                         | LOC111994345      | AT4G36220             | F5H                          | <i>Ferulate-5-hydrolase</i>                                | -1.853      | -1.945               | -2.104      | -2.988               | -0.251      | -1.043               |
| Stress                  | LOC112002958      | AT5G59720             | HSP17.4                      | <i>Heat Shock Protein 17.4</i>                             | 2.217       | 3.124                | 2.573       | 3.381                | 0.356       | 0.256                |
|                         | LOC112011353      | AT1G35720             | ANN                          | <i>Annexin</i>                                             | 0.701       | 0.681                | 0.667       | 0.768                | -0.035      | 0.087                |
|                         | LOC112028339      | AT3G09640             | APX2                         | <i>Ascorbate peroxidase</i>                                | 0.121       | -0.141               | 0.083       | -0.285               | -0.038      | -0.143               |

<sup>1</sup> Calculated using the data from Soler et al. (2008) and Boher et al. (2018)

<sup>2</sup> Genes analysed in this work, the primers sequences are detailed in Supplemental Table 9.

**Supplemental Table 9.** Primer sequences of the 9 genes that were analysed by RT-qPCR analyses in this work.

| <b>Gene Name</b> | <b><i>Quercus suber</i> identifiers</b> | <b>Best Arabidopsis homologous gene identifier</b> | <b>Primer sequences (from 5'- to 3'-end), forward (Fwd) and reverse (Rev) primers</b> |
|------------------|-----------------------------------------|----------------------------------------------------|---------------------------------------------------------------------------------------|
| PDH-E1 $\alpha$  | LOC112030007                            | AT1G01090                                          | Fwd: GGTTAGGGAGGTGGCAAAGG<br>Rev: TTCTCAGCAGGGTCACGAAG                                |
| WRI1             | LOC112012371                            | AT3G54320                                          | Fwd: GGCATTTCTCTGGGTTGTGA<br>Rev: CCTGTGTTGGTTCTGTCATTCC                              |
| BRL3             | LOC111999928                            | AT3G13380                                          | Fwd: AGAAAGCAAAGGCGAAGGAA<br>Rev: TGGGGAGAACAAAGTAATGGAG                              |
| GID1B            | LOC112001486                            | AT3G63010                                          | Fwd: AAGCCCTCCAATACCAATCG<br>Rev: TCCTTCTTCATCCAATGTTTGC                              |
| ETR2             | LOC111993884                            | AT3G23150                                          | Fwd: AAGGGGAGCGATGAAGTGAA<br>Rev: ATTGGAAACCCGAAGCATTG                                |
| HK3              | LOC112030007                            | AT1G27320                                          | Fwd: CGACATCAAAGACACCACCA<br>Rev: TCTCCCCTCAAATGCTACCC                                |
| HB8              | LOC112029705                            | AT4G32880                                          | Fwd: CAGCAGTTCCAGTAGCCTTCG<br>Rev: TCAACACCATCTGACACCTCA                              |
